# **CYLD, a Mechanosensitive Deubiquitinase, Regulates TGF $\beta$ for Load-induced Bone Formation and Mediates PGE<sub>2</sub>-dependent Repression of TGF $\beta$ Signaling in Osteocytes**

Jacqueline Nguyen<sup>1</sup> and Tamara Alliston<sup>1</sup>

<sup>1</sup> Department of Orthopaedic Surgery, University of California, San Francisco, 94143, USA

Correspondence: Tamara Alliston (Tamara.Alliston@ucsf.edu)

## **Abstract**

Osteoporosis is a bone degenerative disease that stems from an imbalance of bone formation and bone resorption, which must be coordinated to maintain bone homeostasis. Lack of mechanical stimulus on bone is a significant contribution to osteoporosis experienced by astronauts and bed-bound patients. Many pathways involved in bone homeostasis have been shown to regulate mechanotransduction in bone and specifically osteocytes, the central cell mediating bone mechanotransduction. TGF $\beta$  signaling is essential for coordinating osteoblast and osteoclast activities and is rapidly repressed in osteocytes within 5 hours following mechanical loading on the mice tibiae. PGE<sub>2</sub> is a well-known mechanotransduction mediator in osteocytes that immediately responds to mechanical stimulus within 5 minutes. Although the importance of TGF $\beta$  and PGE<sub>2</sub> in osteocyte mechanotransduction is established, the mechanism of TGF $\beta$  signaling in mechanosensitive bone remains to be determined, which may involve crosstalk with the PGE<sub>2</sub> pathway. Here, we used an in vivo mice

hindlimb loading system to identify mechanosensitive molecules in the TGF $\beta$  pathway and determined the role of PGE2 in regulating TGF $\beta$  signaling. We found phosphorylated Smad3, an effector of TGF $\beta$ , is reduced as early as 3 hours after mechanical stimulus in the tibiae. PGE2 and its receptor, EP2, repress pSmad3 expression and activity on Pai1 transcription in osteocytes. Interestingly, PGE2 and EP2 regulate pSmad3 turnover through a proteasomal-dependent mechanism and in particular through CYLD, a deubiquitinase. CYLD protein level is reduced within 3 hours after mechanical loading in the tibiae and significantly CYLD is required for the rapid load-mediated repression of pSmad3 and load-induced bone formation. Our data introduces CYLD as a novel mechanosensitive deubiquitinase and provides a framework for PGE2 repression of TGF $\beta$  signaling in osteocytes. The data here suggests CYLD may be a plausible target for controlling mechanosensitive protein turnover in osteocytes and bone formation.

## **Introduction**

Osteoporosis predisposes 125 million people worldwide to the risk of fractures and consequently lowers quality of life [1]. Mechanical loading on bone is critical for the maintenance of bone mass and prevention of low bone mass diseases such as osteoporosis. Evidently in astronauts, sedentary adults, mice with hindlimb unloading, the absence or reduction of mechanical stimulus resulted in deregulation of mineral homeostasis and bone loss [2] [3] [4]. Osteocytes are the centralized bone cells that sense the mechanical stimulus and transduce this signal to osteoblast and osteoclast to regulate their activity [5]. For example, mechanical loading represses the expression of

an osteocyte-secreted protein, called Sclerostin, which binds the Wnt coreceptor, Lrp5/6, on osteoblast and inhibits osteoblastic activity [6] [7]. Previously, we found that mice with reduced TGF $\beta$  signaling in osteocytes cannot relay the load-mediated repression of *SOST* expression and, consequently, have reduced load-induced bone formation [8]. Although we have shown that TGF $\beta$  is required for load-induced bone formation, the mechanism by which mechanical load regulates TGF $\beta$  signaling in osteocytes remains unclear.

Prostaglandins E2, or PGE2, is one of the early responses to mechanical stimulus in osteocytes and elicit signal transduction in these cells for cell-cell communication and ultimately transcription of genes that elicit bone formation. PGE2 facilitates cell-cell communication by moving between cells through gap channels, like connexin43. Fluid flow on osteocytes induces connexin43 translocation to the cell membrane allowing for PGE2 to move into the adjacent cell [9]. PGE2 can also act on the extracellular side and bind to the EP2 receptor leading to the activation of effectors PKA and PI3K to repress GSK3 $\beta$ , a Wnt effector, in osteocytes [10]. Another Wnt pathway molecule, Sclerostin, is repressed by PGE2 in cultured osteoblasts [11]. In addition, PGE2 produced from mechanically stimulated osteocytes protects osteocytes from glucocorticoid-induced apoptosis [12]. Clearly, PGE2 has a pleiotropic effect on many pathways that maintain osteocyte viability and function.

Although crosstalk between PGE2 and TGF $\beta$  signaling is not defined in osteocytes, in other tissues PGE2 plays an important role in matrix deposition and TGF $\beta$  signaling. For example, PGE2 represses TGF $\beta$  through an EP2/PKA mechanism to induce fibroblast activity [13]. PGE2-activated EP4 signaling in prostate

cancer cells is dependent on TGF $\beta$  to allow for migration and metastasis of these cancer cells [14]. PGE<sub>2</sub>-activated EP2 regulates TGF $\beta$  -induced mammary fibrosis and oncogenesis [15]. Since TGF $\beta$  mediates PGE<sub>2</sub> effects in multiple biological systems, we hypothesized that PGE<sub>2</sub> regulates TGF $\beta$  signaling in osteocytes and possibly during mechanical stimulus.

The rapid load-mediated downregulation of Smad3 phosphorylation in bone suggests a posttranslational mechanism that reduces TGF $\beta$  signaling in osteocytes. Protein degradation by ubiquitin-dependent proteasomal degradation is one method to rapidly reduce levels of signaling molecules. Furthermore, ubiquitin has previously been implicated as a mechanosensitive mechanism in other cell types. For example, in muscle cells, the ubiquitin ligase, CHIP, marks damaged proteins for degradation when cells are subjected to tensional pull [16]. *C. elegans* utilizes the E3 ubiquitin ligase, MTB1, to degrade a mechanosensitive channel called MEC4 allowing for the organism to sense touch [17]. Mechanosensitive control of ubiquitin in osteocyte has not been evaluated.

Ubiquitin is also an important regulatory mechanism in TGF $\beta$  signaling and bone homeostasis. In particular, CYLD is a deubiquitinase that indirectly targets Smad3 for degradation in lung cells to regulate matrix deposition and fibrosis [18]. In addition to regulating the TGF $\beta$  pathway, CYLD targets NEMO, a subunit of IKK, and represses NF- $\kappa$ B signaling [19]. The NF- $\kappa$ B pathway is important for regulating RANK signaling for osteoclastogenesis. CYLD deficient mice have increased osteoclast numbers and activities and, consequently, low bone mass [20]. Since Smad3 is rapidly downregulated in mechanically stimulated bone, we hypothesized that CYLD

participates in load-mediated repression of TGF $\beta$  signaling in osteocytes and in load-induced bone formation.

Although the importance of TGF $\beta$  and PGE2 in osteocyte mechanotransduction is established, the mechanism of TGF $\beta$  signaling in mechanosensitive bone remain to be determined, which may involve crosstalk with the PGE2 pathway. Signaling complexes turnover is essential to control signal transduction and cellular activities. However, the mechanisms of ubiquitin and protein turnover in osteocyte mechanotransduction are not well-studied. Therefore, examining the role of CYLD in controlling PGE2 and TGF $\beta$  pathways in osteocyte will uncover novel signaling mechanisms that act rapidly in osteocyte mechanotransduction.

## **Materials and Methods**

### *Mice:*

Treatments and protocols used for the animal studies were approved by the University of California, San Francisco Institution Animal Care and Use Committee and were designed to minimize discomfort to the animals. This study used 8-9 week-old male CYLD-deficient mice [21]. C57BL/6 wild type littermates were used as comparative controls.

### *In Vivo Mechanical Loading:*

Axial compressive loads equivalent to 10 times the mouse's body weight were delivered by a Bose Electroforce ELF3200 desktop load frame (Bose, MN, USA) fitted

with two custom-made hemi-spherical fixtures that gripped the mouse knee and ankle [8]. Similar methods of in vivo loading have been shown to upregulate bone anabolism [22]. In our analysis of these ex vivo limb loading conditions using in situ strain rosettes, this range of parameters produces maximum principal strains in the range of 1500-2500  $\mu\epsilon$  on the mid-diaphyseal surface of the tibiae. For each mouse, only the right hind limb was loaded, while the left hind limb was not loaded to serve as the contralateral control (nonloaded). Each round of loading consisted of 600 cycles of axial compression at 1 Hz for 10 minutes administered under general injectable anesthesia (ketamine). The anesthesia recovery agent, atipamezole, was not used. Unless otherwise indicated, mice were subjected to this loading regimen once and were euthanized at the indicated time points after loading. For analysis of load-induced bone formation in CYLD-deficient mice, mice were loaded for 5 consecutive days as described below.

#### *Histomorphometry:*

Mice were loaded for 5 consecutive days (with one bout of loading each day) with calcein injected at day 1 and day 5 of the loading regimen. Two days after the last loading, mice were euthanized and the tibiae were collected and stored in 4% paraformaldehyde in PBS. Bones were processed and embedded in methyl methacrylate for sectioning to generate 5  $\mu\text{m}$  sections for analysis of calcein labeling with an epifluorescent microscope at 20X magnification. Calcein labels were measured using ImageJ.

#### *Cell Culture:*

MLO-Y4 cells (gift from Dr. Lynda Bonewald), a mature mouse osteocyte cell line, were used for the in vitro studies. MLO-Y4 cells were cultured as described on plastic tissue culture plates coated with rat-tail collagen I (BD). These cells are cultured in 2.5% heat-inactivated Fetal Bovine Serum (Characterized, Hyclone) and 2.5% heat-inactivated Bovine Calf Serum (UCSF CCF) in alpha-MEM media containing nucleosides (UCSF CCF). At 80% confluence, MLO-Y4 cells were treated with the following reagents in serum-free media: 5 ng/ml TGF $\beta$ 1 (Peprotech, 100-36E), 3.2 $\mu$ M Butaprost (EP2 agonist, Cayman), 10 $\mu$ M GWX627368X (EP4 antagonist, Cayman), 50 $\mu$ M MG132 (proteasome inhibitor, Sigma), 20 $\mu$ M AH6809 (EP2 antagonist, Cayman), or 20 $\mu$ M PGE1 alcohol (EP4 agonist, Cayman) for the indicated times. All agents were resuspended in solvents suggested by product manufacturers. Vehicle was added to cells in controls using the same conditions.

*siRNA or shRNA knockdown of CYLD:*

CYLD knockdown was achieved using a stably expressed lentiviral pLKO.1 puro mouse CYLD shRNA construct (Sigma, MC5) and nontarget shRNA (Sigma, SHC002). Lentiviral vectors were packaged into the virus by the UCSF RNAi Core. MLOY4 cells were grown to 80% confluency and infected with CYLD or nontarget lentivirus. MLOY4 cells with the shRNA vectors were selected with 5  $\mu$ M Puromycin and maintained under selection throughout the experiments. We were able to achieve about a 50% knockdown verified through qPCR of the nontarget and CYLD shRNA transfected cells.

CYLD knockdown using siRNA was achieved using mouse CYLD siRNA (AUAACUAGAUACGUAAGACUU) and scrambled (GUCUUACGUAUCUAGUUUUU). siRNA oligos were transfected into MLOY4 cells using Lipofectamine2000. Cells were

treated as indicated 48-72 hours after transfection. RNA and protein were extracted as indicated.

*Quantitative PCR:*

RNA from the tibia bone was extracted by first removing the epiphyses, and subsequently the bone was centrifuged to remove the marrow. The bones were snap frozen in liquid nitrogen and pulverized with a mortar and pestle. Bone powder was transferred to Trizol (Invitrogen) and RNA was purified using the Invitrogen Purelink system according to the manufacturer's instructions. RNA was extracted from cells using the Qiagen RNeasy Mini Kit following the manufacturer's instructions. RNA concentration was measured using a Nanodrop ND1000 Spectrophotometer. cDNA was generated from up to 1 µg of RNA with the iScript cDNA Synthesis kit (Bio-Rad). Quantitative PCR was performed using iQ SYBR Green Supermix (Bio-Rad) with the primers on the table below. Each gene was normalized against the housekeeping gene, L19. Analysis used the  $\Delta\Delta$ CT method to compare the load vs nonloaded samples from the same animal.

**Table 2.1: Primers for QPCR of genes of interests.**

| <b>Gene</b>        | <b>Forward Sequence</b> | <b>Reverse Sequence</b>  |
|--------------------|-------------------------|--------------------------|
| <b>Mouse L19</b>   | ACGGCTTGCTGCCTTCGCAT    | AGGAACCTTCTCTCGTCTTCCGGG |
| <b>Mouse TGFβ1</b> | AGCCCGAAGCGGACTACTAT    | TCCCGAATGTCTGACGTATTG    |



|                                     |                           |                           |
|-------------------------------------|---------------------------|---------------------------|
| <b>Mouse TGF<math>\beta</math>2</b> | GAAATACGCCCAAGATCGAA      | TGTCACCGTGATTTTCGTGT      |
| <b>Mouse TGF<math>\beta</math>3</b> | TGAATGGCTGTCTTTCGATG      | ATTGGGCTGAAAGGTGTGAC      |
| <b>Mouse T<math>\beta</math>RI</b>  | TCGACGCTGTTCTATTGGTG      | CAACCCATGGATCAGAAGGT      |
| <b>Mouse T<math>\beta</math>RII</b> | AGGACCATCCATCCACTGAA      | TGTCGCAAGTGGACAGTCCT      |
| <b>Mouse Smad3</b>                  | TGAAGCGCCTGCTGGGTTGG      | GCTCGTCCAAGTGCCTCGTC      |
| <b>Mouse CYLD</b>                   | GGACAGTACATCCAAGACCG      | GAAGTGCATGCGGTTGCTC       |
| <b>Mouse Pai1</b>                   | AACCAATTTACTGAAAACTGCACAA | TCCGGTGGAGACATAACAGAT     |
| <b>Mouse Htra1</b>                  | CAGTCACCACTGGGATCGTC      | ATCCAATCACCTCGCCATC       |
| <b>Mouse MCSF</b>                   | CCCATATTGCGACACCGAA       | AAGCAGTAACTGAGCAACGGG     |
| <b>Mouse MMP2</b>                   | GATAACCTGGATGCCGTCGTG     | CTTCACGCTCTTGAGACTTTGGTTC |

*Western Blot Analysis:*

Bone protein was isolated from liquid nitrogen snap frozen tibia by pulverizing the bone using a mortar and pestle and transferring the powder to radioimmunoprecipitation buffer (RIPA) containing 10 mM Tris, pH 8, 1 mM EDTA, 1 mM EGTA, 140 mM sodium chloride, 1% sodium pyrophosphate, 100 mM sodium fluoride, 500  $\mu$ M PMSF, and 5 mg/mL eComplete Mini protease inhibitor tablet (Roche). Lysates were sonicated for 10 seconds 8 times in an ice-cold water bath and centrifuged to separate the protein extract. Bradford assay was used to quantify the amount of proteins and similar amount

of proteins were loaded onto the gel. The protein supernatant was loaded onto a 10% SDS-PAGE gel, separated, and transferred to a nitrocellulose membrane. Similarly, MLO-Y4 whole cell lysate was collected in RIPA buffer, sonicated for 10 seconds 3 times in ice-cold water bath, for separation on a 10% SDS-PAGE as above. Westerns were probed using the following antibodies: mouse anti-beta actin (Abcam), rabbit anti-pSmad3 (gift from Dr. E. Leof), rabbit anti-Smad2/3 (Santa Cruz Biotech or abcam), rabbit anti-T $\beta$ RI (Santa Cruz Biotech), and rabbit anti-CYLD (Sigma). Fluorescently-tagged secondary antibodies were used to detect the primary antibodies above and the blots were imaged on an Odyssey LiCor Imaging System. The protein bands were normalized to the housekeeping protein, beta-actin, and the intensity was measured on the LiCor imaging software according to manufacture's instructions.

### *Statistical Analyses:*

Statistics were performed using GraphPad Prism 5. For the animal studies, at least 5 animals were used for the statistical analysis. For the in vitro studies, each experiment had two technical replicates and was repeated at least three times. T-tests were used to compare the differences between groups of normally distributed data. Nonparametric tests were used for non-normally distributed data as stated in each figure. Significance of comparisons is defined by p-values equal to or less than 0.05.

## **Results**

### *Rapid post-transcriptional control of TGF $\beta$ mechanosensitivity*

We previously reported the rapid mechanosensitive repression of TGF $\beta$  signaling within 5 hours of in vivo hindlimb loading [8]. Although the mechanoregulation of TGF $\beta$  signaling was essential for load-induced bone formation, the mechanisms responsible for TGF $\beta$  mechanosensitivity in bone remain unclear. To elucidate these mechanisms, we examined the effect of short-term in vivo hindlimb loading on components of the TGF $\beta$  signaling pathway, including TGF $\beta$  ligands, receptors, Smads, and other known TGF $\beta$  effectors. Consistent with our prior findings at 5 hours after hindlimb loading [8], Smad 3 and Smad3 phosphorylation were decreased within 3 hours of load, relative to nonloaded tibiae (Figure 1A). However, transcriptional analysis of TGF $\beta$  ligands (TGF $\beta$ 1, TGF $\beta$ 2, TGF $\beta$ 3), receptors (T $\beta$ RI and T $\beta$ RII), and Smads (Smad3) show no significant differences between nonloaded and loaded tibiae (Figure 1C). Other factors implicated in the post-transcriptional regulation of TGF $\beta$  signaling, including HtRA1 and CYLD, also show no load-dependent differences in mRNA expression (Figure 1C).

Interestingly, the expression of CYLD, a deubiquitinase implicated in TGF $\beta$  signaling in the lung [18], was significantly reduced by at least 50% within 3 hour of loading (Figure 1B). These findings, as well as the absence of transcriptional differences in TGF $\beta$  signaling components at this time point, collectively focused our attention on post-transcriptional mechanisms responsible for TGF $\beta$  mechanosensitivity in bone.

*Prostaglandins repress Smad3 phosphorylation and CYLD expression in an EP2-dependent mechanism*

To further dissect the mechanisms involved in the mechanoregulation of TGF $\beta$  signaling, we evaluated the regulation of TGF $\beta$  signaling by prostaglandins in MLO-Y4 osteocyte-like cells. PGE<sub>2</sub> is an established early mediator of mechanotransduction in osteocyte and is rapidly increased within 10 minutes of fluid flow stimulation in osteocytes [23]. Blocking EP2 receptor by the antagonist, AH6809, inhibits fluid flow stimulated PGE<sub>2</sub> activity in osteocytes [24]. In addition, PGE<sub>2</sub> represses TGF $\beta$  signaling in mammary tumor cells through EP2 for tumorigenesis [15].

To determine the role of prostaglandins in TGF $\beta$  signaling in osteocytes, we treated MLO-Y4 cells with 5 $\mu$ M PGE<sub>2</sub> for 3 hours. While TGF $\beta$  stimulates a robust induction of Smad3 phosphorylation in MLO-Y4 cells, PGE<sub>2</sub> treatment suppresses both basal and TGF $\beta$ -inducible Smad3 phosphorylation (Figure 2A). Following TGF $\beta$  stimulation, phosphorylated Smad3 activates transcription of TGF $\beta$  target genes such as Serpine1, Pai1, (Figure 2B). However, PGE<sub>2</sub> significantly reduces TGF $\beta$ -inducible Serpine1 mRNA expression. Prostaglandins signal through EP2. Butaprost, a pharmacologic agonist of the EP2 receptor, mimics the effects of PGE<sub>2</sub> treatment, repressing basal and TGF $\beta$ -inducible Smad3 phosphorylation (Figure 2C), as well as suppressing TGF $\beta$ -inducible Serpine1 mRNA expression (Figure 2D).

*Prostaglandins suppress Smad3 phosphorylation in a ubiquitination-dependent mechanism*

The common regulation of Smad3 phosphorylation and CYLD expression by load in bone, and by prostaglandins in MLO-Y4 osteocyte-like cells, led us to investigate the epistatic interaction of Smad3 and CYLD. Since CYLD is a deubiquitinase that regulates proteolytic degradation [18], we tested the effect of proteasome inhibition on the regulation of Smad3 phosphorylation by TGF $\beta$  and prostaglandins. As in Figure 2, prostaglandins block TGF $\beta$  inducible Smad3 phosphorylation (Figure 3A). However, the inhibitory effect of prostaglandins on Smad3 phosphorylation is reversed in MLO-Y4 cells treated with the proteasome inhibitor MG132 (Figure 3A). This suggests that prostaglandin repression of Smad3 phosphorylation in osteocytes relies on proteasomal activity.

Since Smad3 phosphorylation and CYLD protein expression were regulated similarly in response to mechanical loading in vivo, we hypothesized that CYLD would also be regulated by prostaglandins in vitro. In the same conditions used to evaluate Smad3 phosphorylation, both PGE2 (Figure 3B) and the EP2 agonist (Figure 3C) reduced CYLD protein expression within 3 hour, in basal conditions as well as in the presence of TGF $\beta$ . Therefore, prostaglandin signaling through EP2 receptors in cultured osteocytes is sufficient to mimic the rapid repression of Smad3 phosphorylation and CYLD expression in hindlimb-loaded bones.

*CYLD is required for PGE2/EP2 repression of TGF $\beta$  signaling in osteocytes*

To test the hypothesis that the deubiquitinase CYLD controls the level of Smad3 phosphorylation in osteocytes, we ablated CYLD expression in MLO-Y4 cells. CYLD mRNA expression was 50% lower in MLO-Y4 cells transfected with CYLD siRNA, relative to cells transfected with a scrambled siRNA control (Figure 4A). Likewise, CYLD siRNA significantly reduced CYLD protein expression (Figure 4B) and increased the expression of CYLD-repressed genes, MMP2 and MCSF (Figure 4C) [25]. We tested the hypothesis that CYLD is required for prostaglandin-dependent repression of Smad3 phosphorylation. As expected, the EP2 agonist significantly represses TGF $\beta$ -inducible Smad3 phosphorylation in control siRNA-transfected MLO-Y4 cells (Figure 4D). However, this repression is lost in cells with reduced CYLD activity due to CYLD siRNA transfection. Likewise, the ability of prostaglandins to block TGF $\beta$ -inducible Serpine1 mRNA expression is abrogated in CYLD siRNA transfected cells (Figure 4E). Therefore, prostaglandins antagonize TGF $\beta$  signaling through Smad3 in a CYLD-mediated mechanism in osteocytes.

*CYLD is required for load-mediated repression of pSmad3 and load-induced bone formation*

The rapid epistatic control of Smad3 by prostaglandins and CYLD led us to hypothesize that CYLD is required for mechanosensitive control of TGF $\beta$  signaling in bone anabolism. This hypothesis is consistent with the mechanosensitive repression of CYLD expression in loaded bone (Figure 1C). To test this hypothesis, we applied mechanical stimulation to tibiae of CYLD knockout mice and the wild type littermates

[21]. As expected, within 3 hour after mechanical load, loaded tibiae of wild type mice showed reduced levels of Smad3 phosphorylation relative to nonloaded contralateral tibia. In CYLD-deficient mice, however, loading caused no significant changes in the level of Smad3 phosphorylation (Figure 5A and 5B).

To test the functional effects of CYLD-deficiency, histomorphometric analysis were used to assess the effect of load on bone formation in wild type and CYLD-deficient mice. Calcein labeling showed an increase in bone formation in loaded tibiae of wild type mice, relative to the non-loaded contralateral tibia (Figure 5C). However, no further increase was observed in loaded tibiae of CYLD knockout mice compared to control. Accordingly, the matrix apposition rate (MAR) and the bone formation rate (BFR) are significantly increased in loaded bone of wild type mice compared to control but not in loaded tibiae of CYLD knockout mice compared to control (Figure 5D and 5F). No significant load-dependent differences in the mineralization surface were observed in either wild type or CYLD-deficient bones (Figure 5E). Together these data indicate that CYLD is necessary for the rapid mechanosensitive repression of Smad3 phosphorylation, as well as for load-induced bone formation.

## **Discussion**

In summary, we found that TGF $\beta$  signaling is mechanoregulated as early as 3 hour after load. TGF $\beta$ -inducible phosphorylated Smad3 is repressed at the protein level within 3 hour after mechanical loading on the tibia. This indicates a post-translational

mechanism of load-mediated repression of TGF $\beta$  signaling and we further investigated this possibility in osteocytes. We found that PGE2 and EP2 repress pSmad3 and the downstream Pai1 expression in osteocytes. PGE2 and EP2 destabilize TGF $\beta$  signaling through a proteasomal-mediated mechanism specifically by CYLD, a deubiquitinase. Furthermore, CYLD is mechanosensitive in bone and is critical for load-induced bone formation (Figure 6).

Mechanical stimulation by compression, tension, fluid flow shear stress, and other physical cues regulates TGF $\beta$  signaling in many biological systems. Fluid flow shear stress in particular exerts diverse effects on TGF $\beta$  signaling. In renal epithelial cells flow reduces protein expression of total and active TGF $\beta$  ligand, but induces Smad2/3 activation within 6 hours of stimulus [26]. Interstitial fluid flow on dermal fibroblasts for 2 hours increases TGF $\beta$ 1 secretion but also decreases T $\beta$ RII protein expression [27]. Periosteal cells in rat hindlimb subjected to 4-point bending had an increase in TGF $\beta$ 1 mRNA expression 4 hours after mechanical load application [28]. We showed in the tibiae of loaded wild type mice TGF $\beta$  ligands mRNA expressions are not significantly altered although pSmad3 is reduced 3 hours after load. Our data provide another evidence that mechanical stimulation rapidly and transiently affect TGF $\beta$  pathway components.

PGE2 is vital to maintaining bone homeostasis and so it functions in many biological processes including mechanotransduction. The inflammatory mediator signals through four different G-protein receptors, EP1-4, with active EP2 and EP4 inducing bone formation [29] [30]. Inhibiting PGE2 synthesis with Naproxen, an NSAID, treatment in mice impairs load-induced bone formation and reduces NGF expression



[31]. EP4 functions downstream of PGE2 to regulate processes for bone homeostasis including crosstalk between the nervous system and bone formation [32]. However, EP4 agonist, ONO4819, additively enhances load-mediated bone formation in rats [33]. In osteocytes, the centralized cells that modulate mechanoreponse in bone, fluid flow stimulation induces PGE2 and EP2 production [24] [12]. EP2 and TGF $\beta$  are both mechanosensitive in osteocytes and this led us to hypothesize that EP2 and TGF $\beta$  may crosstalk in these cells [8]. We showed here that PGE2 and EP2 repress TGF $\beta$  signaling in osteocytes through a proteasomal-mediated mechanism specifically through CYLD activity. Further study on the dependency of TGF $\beta$  signaling in EP2-mediated mechanotransduction in osteocytes and bone would definitively align these two pathways in osteocyte-dependent mechanoregulation.

CYLD and TGF $\beta$  signaling intersect at many levels. CYLD regulates the stability of T $\beta$ RI, Smad7, and Smad3 [34] [18] [25]. In bone, CYLD inhibits osteoclastogenesis and CYLD knockout mice were reported to be sensitive to RANKL-induced osteoclastogenesis thus exhibit low trabecular bone mass but only with slight reduction in cortical bone mass and no change in BV/TV [20]. Our findings showed that CYLD is repressed with load stimulation and is important for load-mediated bone formation in the cortical bone by dynamic histomorphometry. This introduces CYLD as one of the few deubiquitinases to be mechanosensitive, including CHIP and MEC-4, and further study investigating the mechanism of mechanical-dependent regulation of CYLD may suggest CYLD as a possible therapeutic target for osteoporosis [16] [17]. While we uncovered the role of CYLD in regulating TGF $\beta$  signaling in mechanically stimulated osteocytes, CYLD regulates effectors of other pathways such as the Wnt pathway [35]. Studying

how CYLD intersects with other mechanosensitive pathways can uncover how signaling is dampened and controlled for proper homeostasis.

To our knowledge, this is the first study to uncover CYLD mechanosensitivity in bone and provide insights into CYLD's role in the PGE2 pathway. Future studies elucidating CYLD rapid activity in osteocyte-dependent mechanotransduction may support CYLD as a target for osteoporosis treatment.

## Figure Legends

### **Figure 1: Rapid post-transcriptional control of TGF $\beta$ mechanosensitivity.** (A)

Protein levels of TGF $\beta$  receptor type 1 (T $\beta$ RI), phosphorylated Smad3, and Smad3 are reduced in loaded tibiae as compared to nonloaded tibiae (n>6). Activated Smad3 are reduced by 25% in loaded tibiae within 3hr of the mechanical stimulation (n>6, \*p<0.05). CYLD is reduced in loaded tibia 3 hours after stimulus (n>6, \*p<0.05) (B). (C) TGF $\beta$  ligands, receptors, and Smad3 mRNA levels are not significantly regulated by load within 3hr (n>5).

### **Figure 2: Prostaglandins repress Smad3 phosphorylation and CYLD expression**

**in an EP2-dependent mechanism.** PGE2 inhibits pSmad3 and TGF $\beta$  responsive genes PAi1 in MLOY4 cells (A-B). Butaprost, an EP2 receptor agonist, also represses pSmad3 and Pai1 transcriptional activity in MLOY4 cells (C-D). All experiments were repeated at least three times and two technical replicates for the RNA analysis (\* p<0.05).

**Figure 3: Prostaglandins suppress Smad3 phosphorylation in a ubiquitination-dependent mechanism.** MG132, a proteasome inhibitor, stabilizes TGF $\beta$ -activated pSmad3 expression in the presence of PGE2 in osteocytes (\* p<0.05) (A). PGE2 represses CYLD protein expression in MLOY4 cells (B). Stimulation of EP2 in MLOY4 cells also down-regulates CYLD protein expression in MLOY4 cells (C) (\* p<0.05).

**Figure 4: CYLD is required for PGE/EP2 repression of TGF $\beta$  in osteocytes.** CYLD siRNA effectively knockdown CYLD mRNA expression by at least 50% (A). CYLD protein expression is significantly reduced in MLOY4 cells containing CYLD siRNA (B). Knockdown of CYLD leads to increase in MMP2 and MCSF (p<0.05) (C). EP2 prevents TGF $\beta$  transactivation of pSmad3 in control MLOY4 cells, while knockdown of CYLD rescues TGF $\beta$  phosphorylation of Smad3 even in the presence of EP2 stimulation (D). Likewise, reduced CYLD activity in CYLD siRNA MLOY4 cells alleviates EP2-mediated repression of Pai1 mRNA expression (E).

**Figure 5: CYLD is required for load-mediated repression of pSmad3 and load-induced bone formation.** pSmad3 activation is reduced in loaded wild type control mice, but pSmad3 in CYLD mutants is non-responsive to mechanical stimulus on the tibia (A). Quantification of pSmad3 protein bands in wild type and CYLD mutant mice in response to load shows pSmad3 expression is significantly reduced, while in the CYLD knockout mice pSmad3 expression remains unchanged in the presence of load (B). Calcein labeling of newly formed bone with response to load in wild type and CYLD

knockout mice tibiae shows dramatic increase in calcein incorporation in stimulated wild type mice but no clear increase in CYLD knockout mice (C). Dynamic histomorphometry measurements of mineral apposition rate (MAR), mineralizing surfaces (MS), and bone formation rate (BFR) showed a significant increase in MAR and BFR in loaded tibiae of wild type mice but not in loaded tibiae of CYLD knockout mice (D-E) (\*  $p < 0.05$ ).

**Figure 6: Mechanosensitive CYLD mediates PGE2 repression of TGF $\beta$  signaling.**

Load represses pSmad3 and CYLD expressions in bone, while stimulating PGE2 production. PGE2 signals through EP2 in osteocytes to repress CYLD for proteasomal-dependent repression of pSmad3.

**Bibliography**

- [1] D.M. Black, C.J. Rosen, Postmenopausal Osteoporosis, *New England Journal of Medicine* 374(3) (2016) 254-262.
- [2] T. Lang, A. LeBlanc, H. Evans, Y. Lu, H. Genant, A. Yu, Cortical and trabecular bone mineral loss from the spine and hip in long-duration spaceflight, *Journal of Bone and Mineral Research* 19(6) (2004) 1006-1012.
- [3] L. Gabel, H.M. Macdonald, L. Nettlefold, H.A. McKay, Physical Activity, Sedentary Time, and Bone Strength From Childhood to Early Adulthood: A Mixed Longitudinal HR-pQCT study, *Journal of Bone and Mineral Research* 32(7) (2017) 1525-1536.

[4] C. Lescale, V. Schenten, D. Djeghloul, M. Bennabi, F. Gaignier, K. Vandamme, C. Strazielle, I. Kuzniak, H. Petite, C. Dosquet, J.-P. Fripiat, M. Goodhardt, Hind limb unloading, a model of spaceflight conditions, leads to decreased B lymphopoiesis similar to aging, *Faseb Journal* 29(2) (2015) 455-463.

[5] L.F. Bonewald, The Amazing Osteocyte, *Journal of Bone and Mineral Research* 26(2) (2011) 229-238.

[6] A.G. Robling, P.J. Niziolek, L.A. Baldrige, K.W. Condon, M.R. Allen, I. Alam, S.M. Mantila, J. Gluhak-Heinrich, T.M. Bellido, S.E. Harris, C.H. Turner, Mechanical stimulation of bone in vivo reduces osteocyte expression of Sost/sclerostin, *Journal of Biological Chemistry* 283(9) (2008) 5866-5875.

[7] A. Morse, M.M. McDonald, N.H. Kelly, K.M. Melville, A. Schindeler, I. Kramer, M. Kneissel, M.C.H. van der Meulen, D.G. Little, Mechanical Load Increases in Bone Formation via a Sclerostin-Independent Pathway, *Journal of Bone and Mineral Research* 29(11) (2014) 2456-2467.

[8] J. Nguyen, S.Y. Tang, D. Nguyen, T. Alliston, Load Regulates Bone Formation and Sclerostin Expression through a TGF beta-Dependent Mechanism, *Plos One* 8(1) (2013).

[9] A.J. Siller-Jackson, S. Burra, S. Gu, X. Xia, L.F. Bonewald, E. Sprague, J.X. Jiang, Adaptation of connexin 43-hemichannel prostaglandin release to mechanical loading, *Journal of Biological Chemistry* 283(39) (2008) 26374-26382.

[10] X. Xia, N. Batra, Q. Shi, L.F. Bonewald, E. Sprague, J.X. Jiang, Prostaglandin Promotion of Osteocyte Gap Junction Function through Transcriptional Regulation of

Connexin 43 by Glycogen Synthase Kinase 3/beta-Catenin Signaling, *Molecular and Cellular Biology* 30(1) (2010) 206-219.

[11] G.L. Galea, A. Sunters, L.B. Meakin, G. Zaman, T. Sugiyama, L.E. Lanyon, J.S. Price, Sost down-regulation by mechanical strain in human osteoblastic cells involves PGE2 signaling via EP4, *Febs Letters* 585(15) (2011) 2450-2454.

[12] Y. Kitase, L. Barragan, H. Qing, S. Kondoh, J.X. Jiang, M.L. Johnson, L.F. Bonewald, Mechanical Induction of PGE(2) in Osteocytes Blocks Glucocorticoid-Induced Apoptosis Through Both the beta-Catenin and PKA Pathways, *Journal of Bone and Mineral Research* 25(12) (2010) 2381-2392.

[13] L.R.K. Penke, S.K. Huang, E.S. White, M. Peters-Golden, Prostaglandin E-2 Inhibits alpha-Smooth Muscle Actin Transcription during Myofibroblast Differentiation via Distinct Mechanisms of Modulation of Serum Response Factor and Myocardin-related Transcription Factor-A, *Journal of Biological Chemistry* 289(24) (2014) 17151-17162.

[14] B.T. Vo, D. Morton, Jr., S. Komaragiri, A.C. Millena, C. Leath, S.A. Khan, TGF-beta Effects on Prostate Cancer Cell Migration and Invasion Are Mediated by PGE(2) through Activation of PI3K/AKT/mTOR Pathway, *Endocrinology* 154(5) (2013) 1768-1779.

[15] M. Tian, W.P. Schiemann, PGE2 receptor EP2 mediates the antagonistic effect of COX-2 on TGF-beta signaling during mammary tumorigenesis, *Faseb Journal* 24(4) (2010) 1105-1116.

[16] A. Ulbricht, F.J. Eppler, V.E. Tapia, P.F.M. van der Ven, N. Hampe, N. Hersch, P. Vakeel, D. Stadel, A. Haas, P. Saftig, C. Behrends, D.O. Fuerst, R. Volkmer, B.

Hoffmann, W. Kolanus, J. Hoehfeld, Cellular Mechanotransduction Relies on Tension-Induced and Chaperone-Assisted Autophagy, *Current Biology* 23(5) (2013) 430-435.

[17] X. Chen, M. Chalfie, Regulation of Mechanosensation in *C. elegans* through Ubiquitination of the MEC-4 Mechanotransduction Channel, *Journal of Neuroscience* 35(5) (2015) 2200-2212.

[18] J.H. Lim, H. Jono, K. Komatsu, C.-H. Woo, J. Lee, M. Miyata, T. Matsuno, X. Xu, Y. Huang, W. Zhang, S.H. Park, Y.-I. Kim, Y.-D. Choi, H. Shen, K.-S. Heo, H. Xu, P. Bourne, T. Koga, H. Xu, C. Yan, B. Wang, L.-F. Chen, X.-H. Feng, J.-D. Li, CYLD negatively regulates transforming growth factor-beta-signalling via deubiquitinating Akt, *Nature Communications* 3 (2012).

[19] S.C. Sun, CYLD: a tumor suppressor deubiquitinase regulating NF-kappa B activation and diverse biological processes, *Cell Death and Differentiation* 17(1) (2010) 25-34.

[20] W. Jin, M. Chang, E.M. Paul, G. Babu, A.J. Lee, W. Reiley, A. Wright, M. Zhang, J. You, S.-C. Sun, Deubiquitinating enzyme CYLD negatively regulates RANK signaling and osteoclastogenesis in mice, *Journal of Clinical Investigation* 118(5) (2008) 1858-1866.

[21] R. Massoumi, K. Chmielarska, K. Hennecke, A. Pfeifer, R. Faessler, Cyld inhibits tumor cell proliferation by blocking Bcl-3-dependent NF-kappa B signaling, *Cell* 125(4) (2006) 665-677.

[22] J.C. Fritton, E.R. Myers, T.M. Wright, M.C.H. van der Meulen, Loading induces site-specific increases in mineral content assessed by microcomputed tomography of the mouse tibia, *Bone* 36(6) (2005) 1030-1038.

- [23] J. Kleinnulend, A. Vanderplas, C.M. Semeins, N.E. Ajubi, J.A. Frangos, P.J. Nijweide, E.H. Burger, SENSITIVITY OF OSTEOCYTES TO BIOMECHANICAL STRESS IN-VITRO, *Faseb Journal* 9(5) (1995) 441-445.
- [24] P.P. Cherian, B.X. Cheng, S.M. Gu, E. Sprague, L.F. Bonewald, J.X. Jiang, Effects of mechanical strain on the function of gap junctions in osteocytes are mediated through the prostaglandin EP2 receptor, *Journal of Biological Chemistry* 278(44) (2003) 43146-43156.
- [25] S. Shinriki, H. Jono, M. Maeshiro, T. Nakamura, J. Guo, J.-D. Li, M. Ueda, R. Yoshida, M. Shinohara, H. Nakayama, H. Matsui, Y. Ando, Loss of CYLD promotes cell invasion via ALK5 stabilization in oral squamous cell carcinoma, *Journal of Pathology* 244(3) (2018) 367-379.
- [26] S.J. Kunnen, W.N. Leonhard, C. Semeins, L.J.A.C. Hawinkels, C. Poelma, P. ten Dijke, A. Bakker, B.P. Hierck, D.J.M. Peters, Fluid shear stress-induced TGF-beta/ALK5 signaling in renal epithelial cells is modulated by MEK1/2, *Cellular and Molecular Life Sciences* 74(12) (2017) 2283-2298.
- [27] S. Nithianathan, A. Crawford, J.C. Knock, D.W. Lambert, S.A. Whawell, Physiological Fluid Flow Moderates Fibroblast Responses to TGF-beta 1, *Journal of Cellular Biochemistry* 118(4) (2017) 878-890.
- [28] D.M. Raabculen, M.A. Thiede, D.N. Petersen, D.B. Kimmel, R.R. Recker, MECHANICAL LOADING STIMULATES RAPID CHANGES IN PERIOSTEAL GENE-EXPRESSION, *Calcified Tissue International* 55(6) (1994) 473-478.
- [29] K. Yoshida, H. Oida, T. Kobayashi, T. Maruyama, M. Tanaka, T. Katayama, K. Yamaguchi, E. Segi, T. Tsuboyama, M. Matsushita, K. Ito, Y. Ito, Y. Sugimoto, F.



Ushikubi, S. Ohuchida, K. Kondo, T. Nakamura, S. Narumiya, Stimulation of bone formation and prevention of bone loss by prostaglandin E EP4 receptor activation, *Proceedings of the National Academy of Sciences of the United States of America* 99(7) (2002) 4580-4585.

[30] V.M. Paralkar, F. Borovecki, H.Z. Ke, K.O. Cameron, B. Lefker, W.A. Grasser, T.A. Owen, M. Li, P. DaSilva-Jardine, M. Zhou, R.L. Dunn, F. Dumont, R. Korsmeyer, P. Krasney, T.A. Brown, D. Plowchalk, S. Vukicevic, D.D. Thompson, An EP2 receptor-selective prostaglandin E-2 agonist induces bone healing, *Proceedings of the National Academy of Sciences of the United States of America* 100(11) (2003) 6736-6740.

[31] J. Park, A. Fertala, R.E. Tomlinson, Naproxen impairs load-induced bone formation, reduces bone toughness, and diminishes woven bone formation following stress fracture in mice, *Bone* 124 (2019) 22-32.

[32] H. Chen, B. Hu, X. Lv, S. Zhu, G. Zhen, M. Wan, A. Jain, B. Gao, Y. Chai, M. Yang, X. Wang, R. Deng, L. Wang, Y. Cao, S. Ni, S. Liu, W. Yuan, H. Chen, X. Dong, Y. Guan, H. Yang, X. Cao, Prostaglandin E2 mediates sensory nerve regulation of bone homeostasis, *Nature Communications* 10 (2019).

[33] H. Hagino, M. Kuraoka, Y. Kameyama, T. Okano, R. Teshima, Effect of a selective agonist for prostaglandin E receptor subtype EN (ONO-4819) on the cortical bone response to mechanical loading, *Bone* 36(3) (2005) 444-453.

[34] Y. Zhao, A.M. Thornton, M.C. Kinney, C.A. Ma, J.J. Spinner, I.J. Fuss, E.M. Shevach, A. Jain, The Deubiquitinase CYLD Targets Smad7 Protein to Regulate Transforming Growth Factor beta (TGF-beta) Signaling and the Development of Regulatory T Cells, *Journal of Biological Chemistry* 286(47) (2011) 40520-40530.

[35] D.V.F. Tauriello, A. Haegebarth, I. Kuper, M.J. Edelman, M. Henraat, M.R. Canninga-van Dijk, B.M. Kessler, H. Clevers, M.M. Maurice, Loss of the Tumor Suppressor CYLD Enhances Wnt/beta-Catenin Signaling through K63-Linked Ubiquitination of Dvl, *Molecular Cell* 37(5) (2010) 607-619.

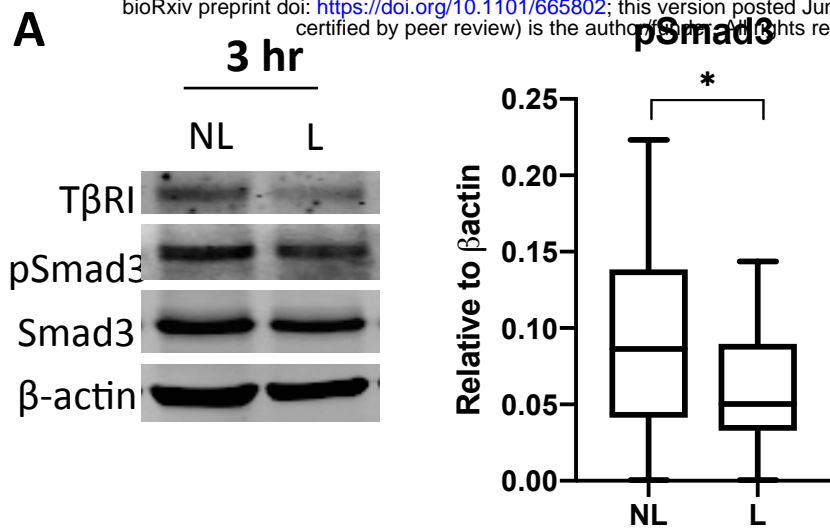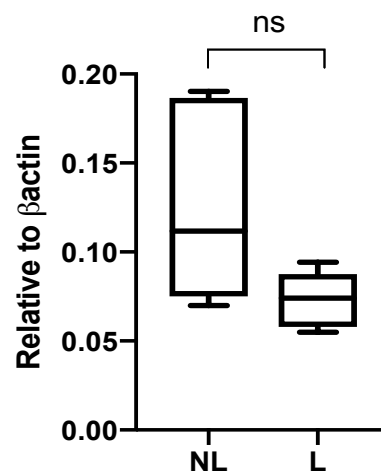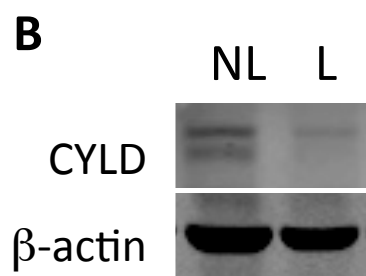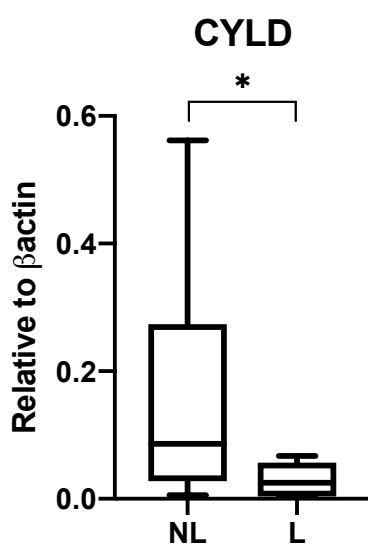

**C**

**TGFβ pathway genes**

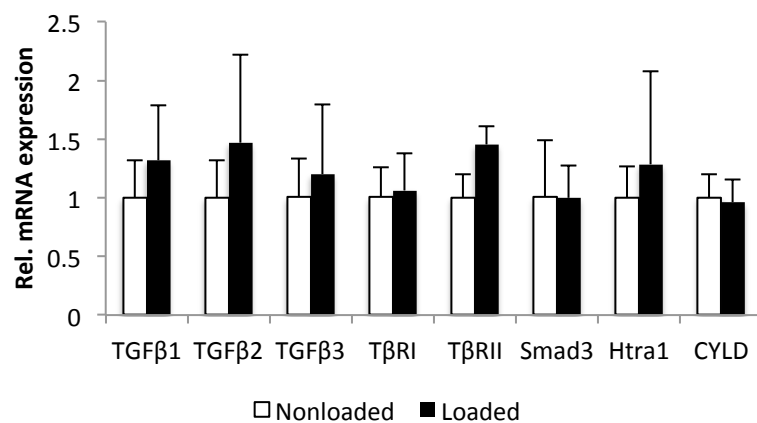

**Figure 1: Rapid post-transcriptional control of TGFβ mechanosensitivity**

**A**

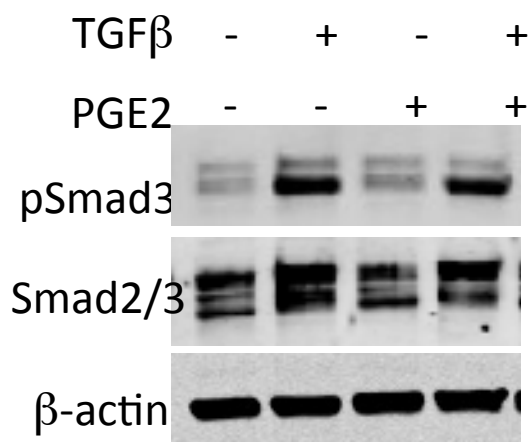

**B**

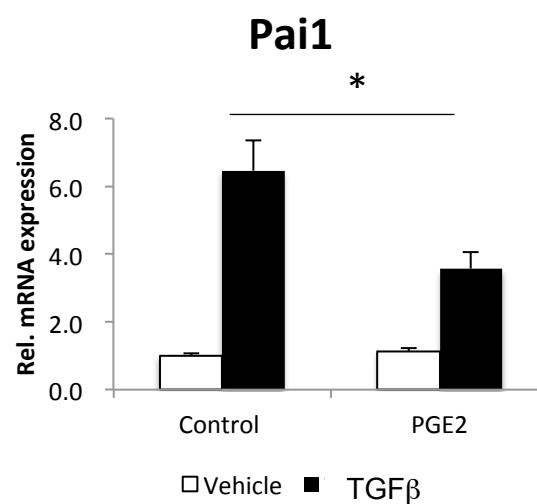

**C**

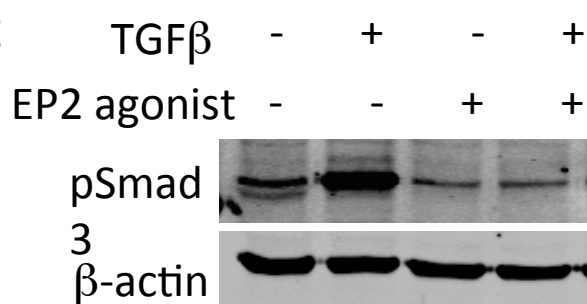

**D**

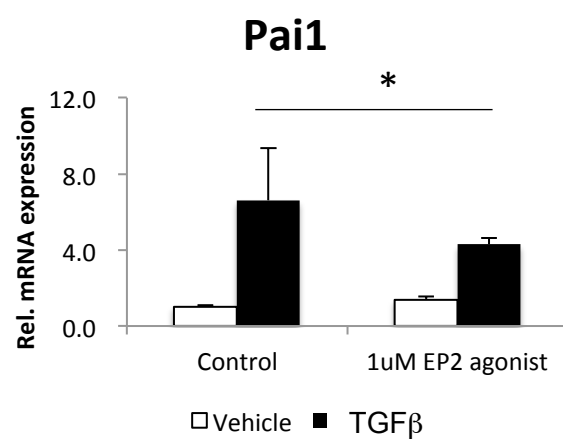

**Figure 2: Prostaglandins repress Smad3 phosphorylation and CYLD expression in an EP2-dependent mechanism**

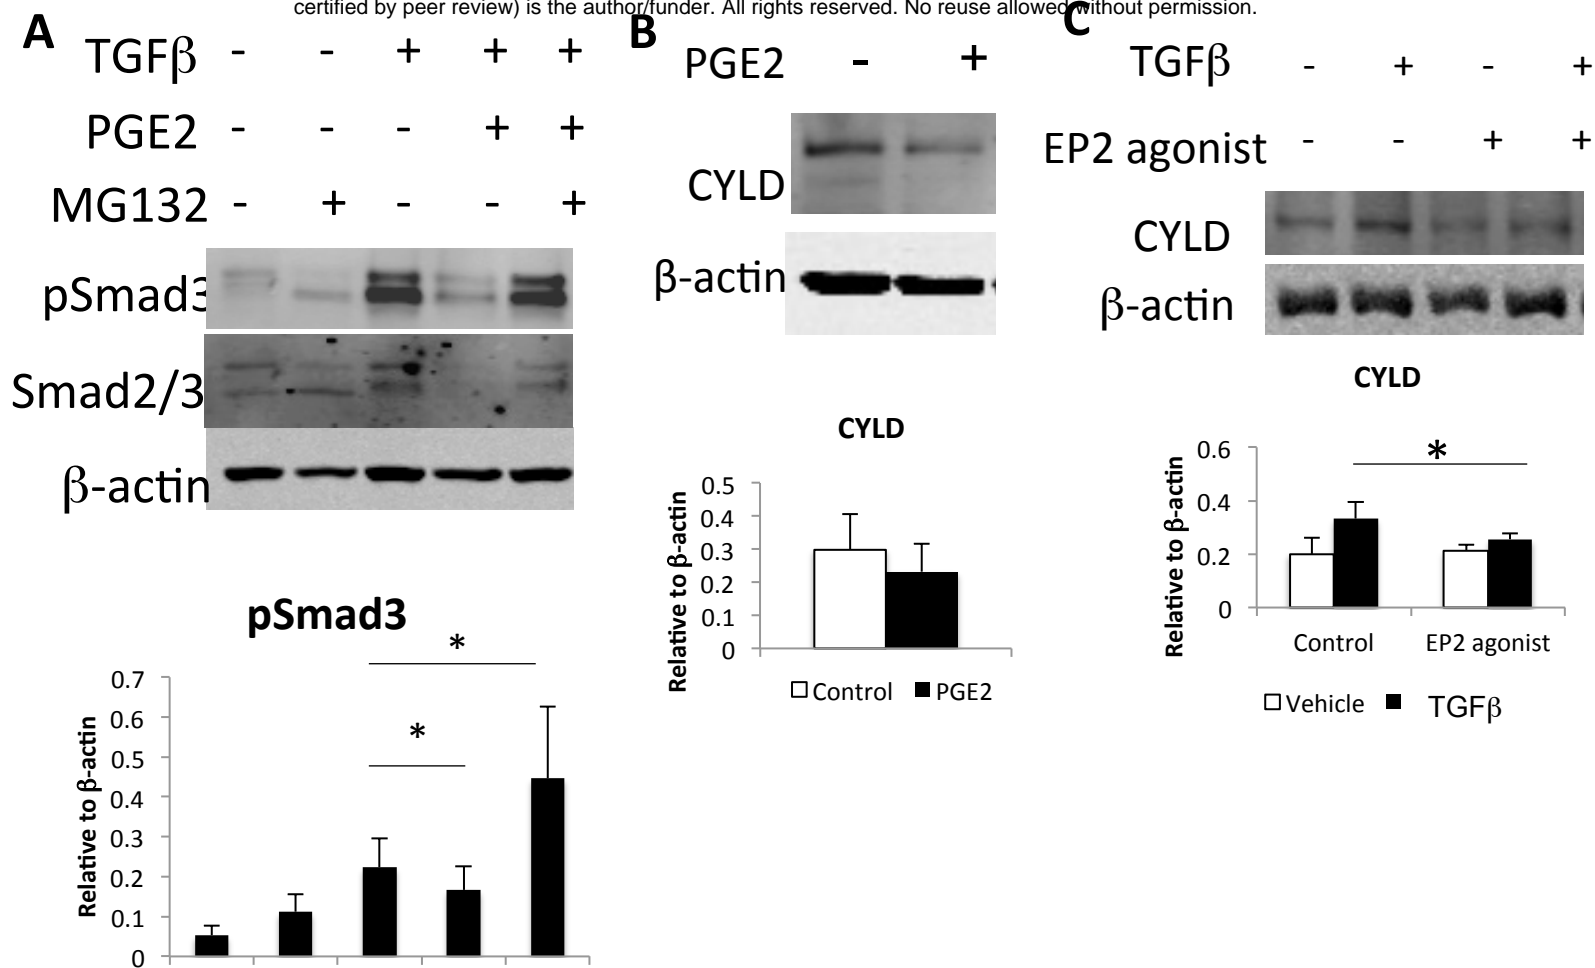

**Figure 3: Prostaglandins suppress Smad3 phosphorylation in a ubiquitination-dependent mechanism**

**A**

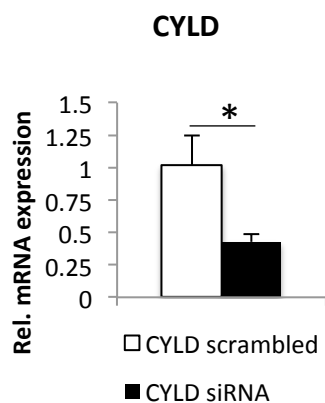

**B**

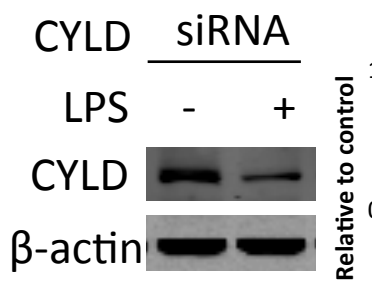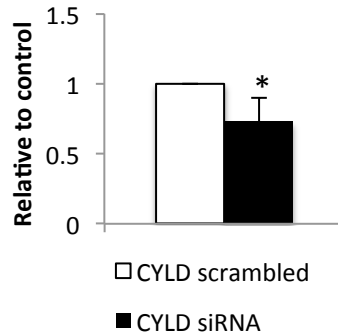

**C**

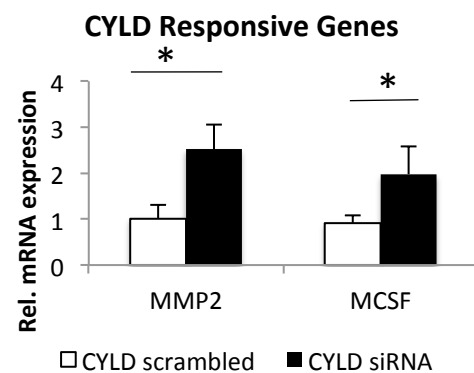

**D**

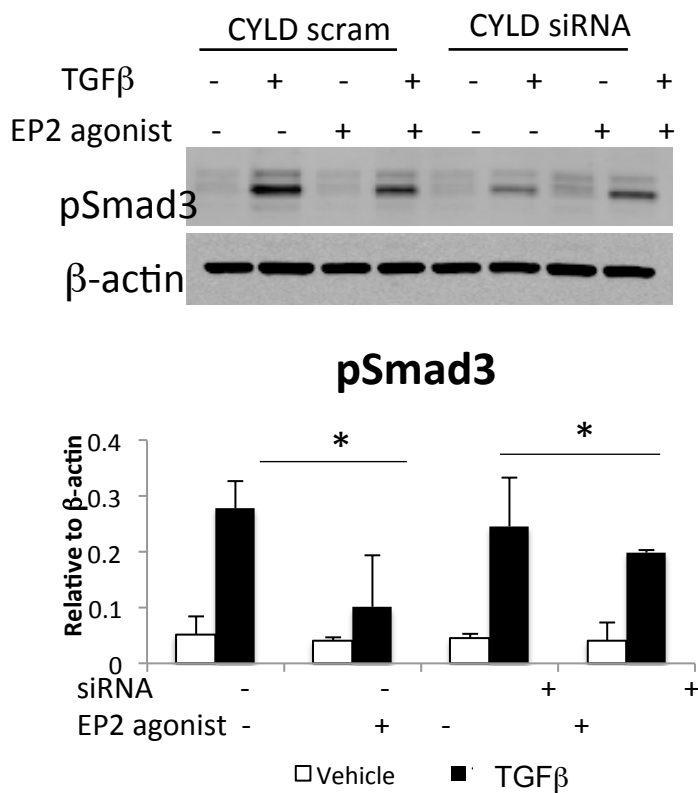

**E**

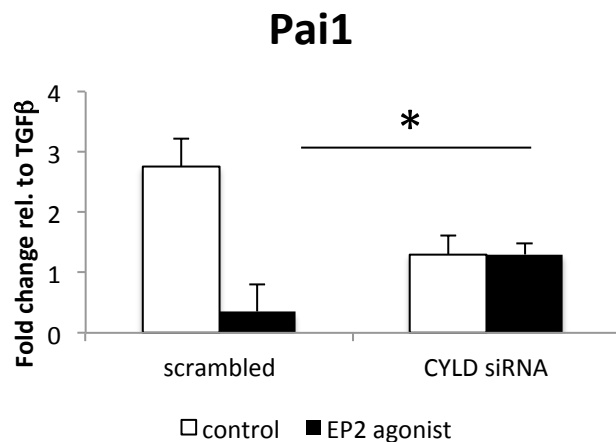

**Figure 4 : CYLD is required for PGE/EP2 repression of TGF $\beta$  signaling in osteocytes.**

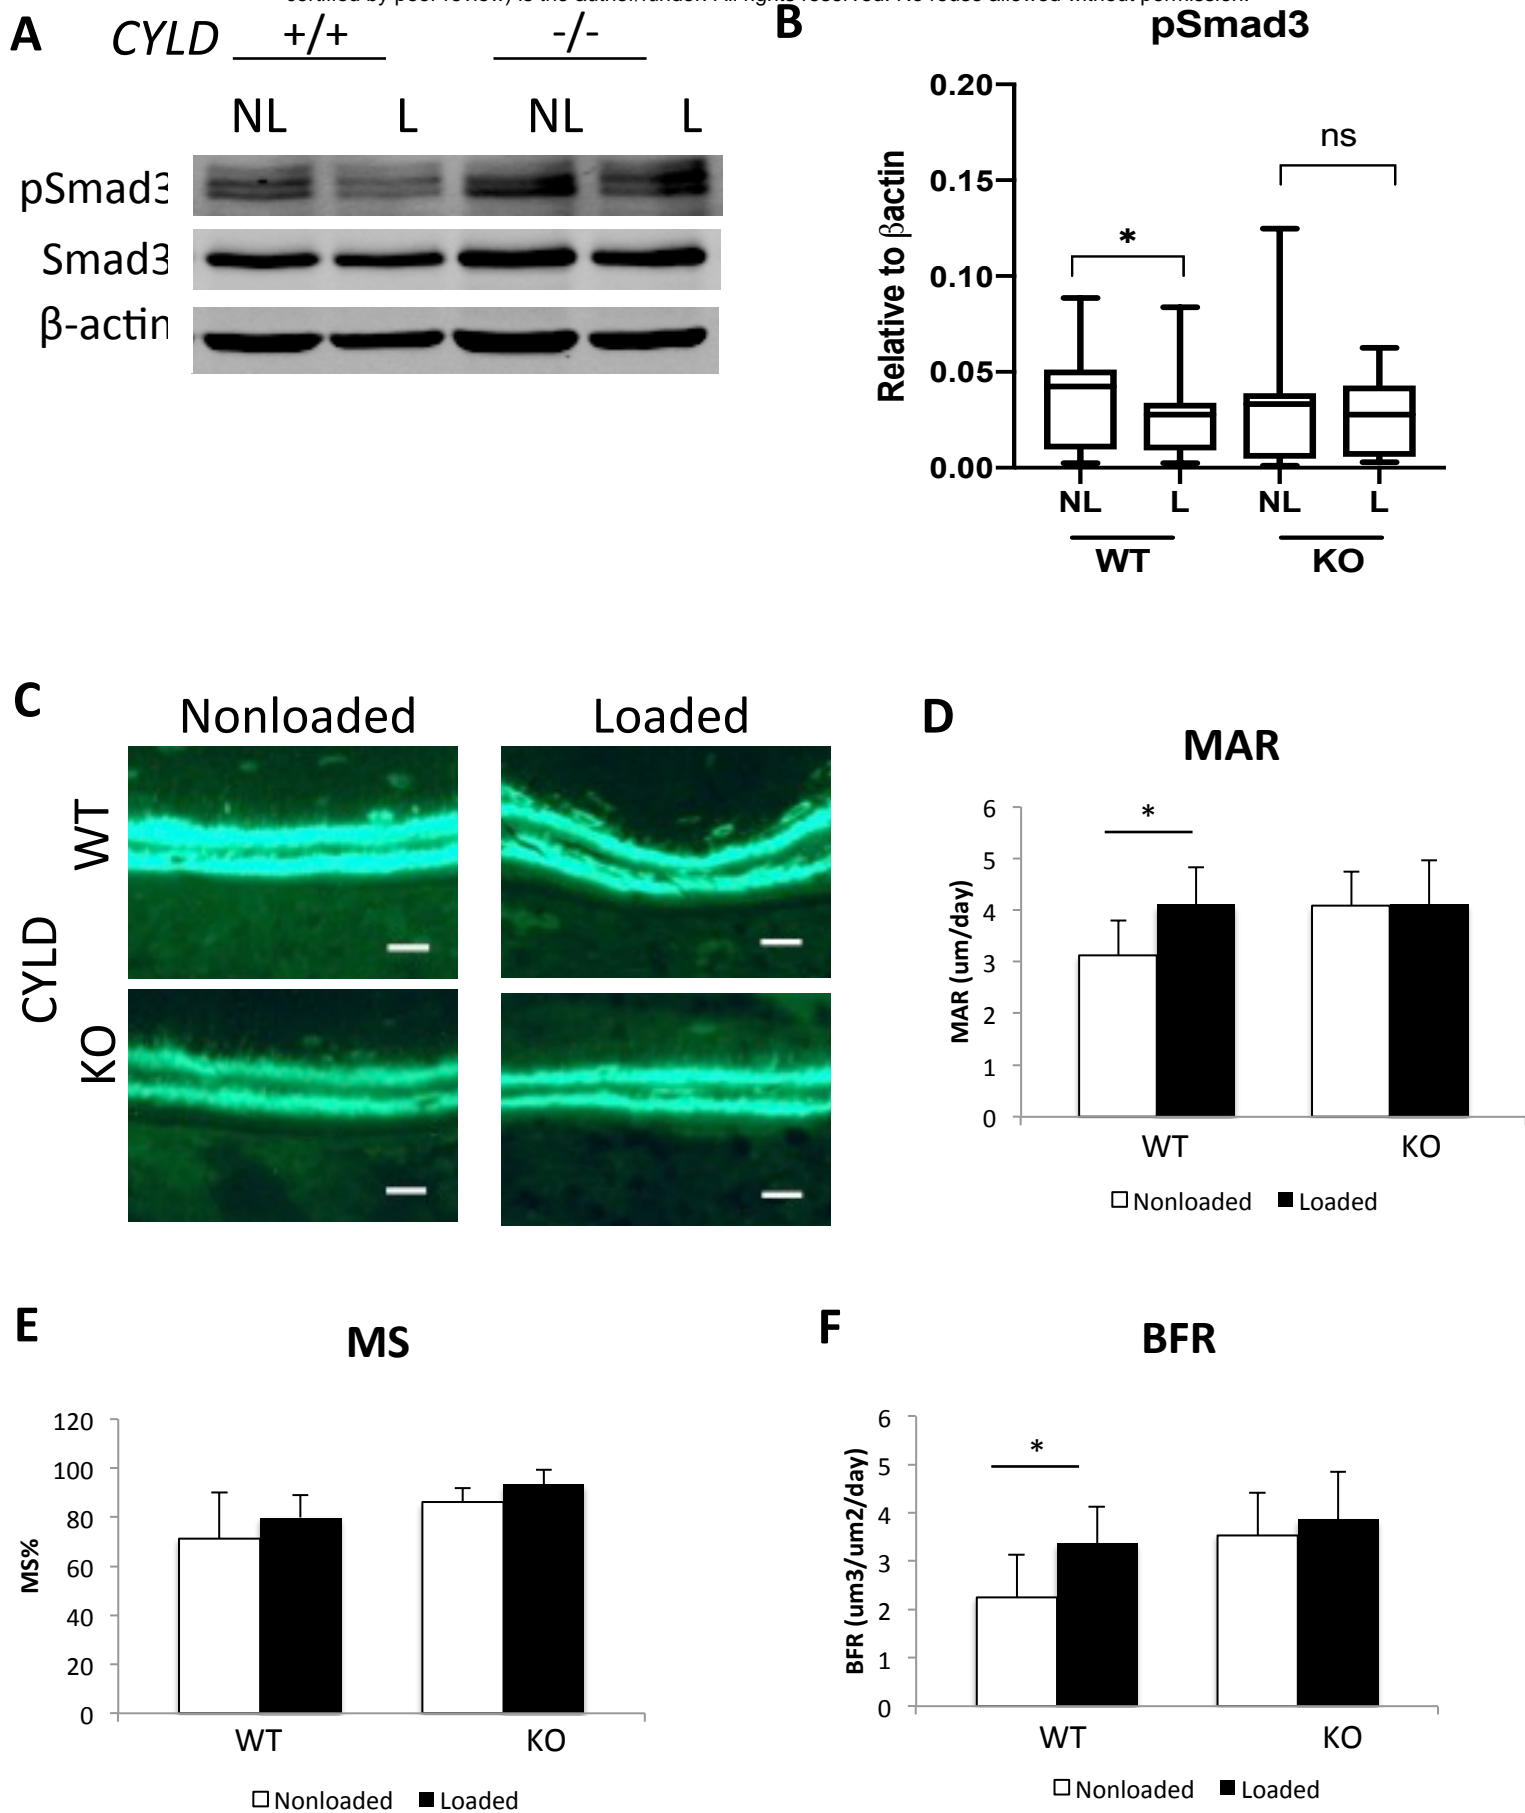

**Figure 5: CYLD is required for load-mediated repression of pSmad3 and load-induced bone formation.**

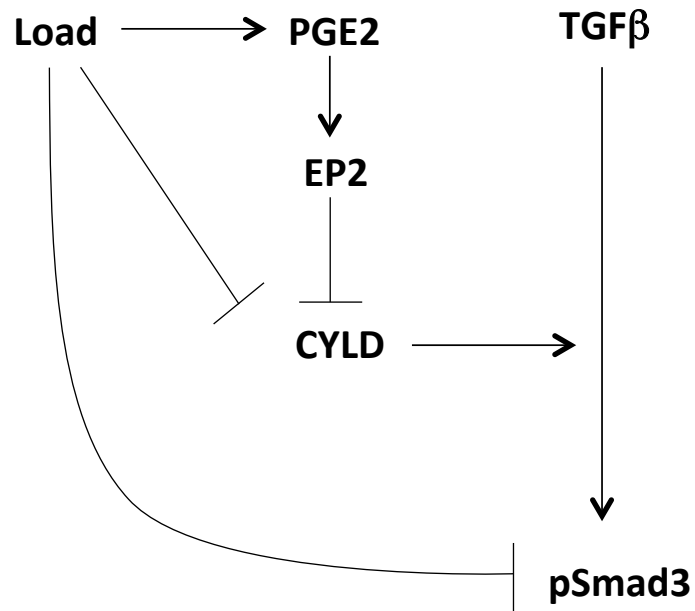

**Figure 6: Mechanosensitive CYLD mediates PGE2 repression of TGFβ signaling.**
